# Supplementary material
Source: publisher figshare collection journal article supplement (https://frontiersin.figshare.com/ndownloader/files/13812482)
Supplement: Supplementary file 1 [file 13812482]

## Sheet: S.Table 2
S. Table 2: List of E. faecium reference genomes
Genome Name	GenBank Accessions	Sequencing Platform	Sequencing Depth	Assembly Method	Contigs	Genome Length	GC Content	Isolation Source	Host Name	Collection Date	Geographic Location
E. faecium E1133	AHWR00000000	Illumina	78.0x	allpaths v. R41985	86	3161146	37.9	feces	Human	2001	USA
E. faecium E2297	AHXV00000000	Illumina	118.0x	allpaths v. R41985	68	3060243	37.7	urine	Human	2001
E. faecium E155	AUWX00000000	Illumina GAII	79.0x	Velvet v. 1.2.01	405	3016290	37.8	stool sample	Human	1995	USA: Chicago
E. faecium strain IHC11	MSIB00000000	Illumina MiSeq	30.0x	CLC NGS Cell v. 9.0	314	3072953	37.67	blood stream	Human	2007	USA: Utah
E. faecium strain IHC3	MSHT00000000	Illumina MiSeq	30.0x	CLC NGS Cell v. 9.0	2657	2491581	38.17	blood stream	Human	2013	USA: Utah
E. faecium strain IHC13	MSID00000000	Illumina MiSeq	30.0x	CLC NGS Cell v. 9.0	316	2926770	37.78	blood stream	Human	2006	USA: Utah
E. faecium strain FDAARGOS_332	NJFI00000000	PacBio	15.15x	SMRT v. 2.3.0, HGAP v. 3.0	8	3317945	37.66	Stool	Human	05-Feb-2015	USA:DC
E. faecium strain VRE2016-194	NLCT00000000	Illumina NextSeq	203x	CLC Genomics v. 7	404	2955034	37.66	Perirectal swab	Human	21-Mar-2016	USA: Pittsburgh
E. faecium strain VRE2014-195	NLCQ00000000	Illumina NextSeq	242x	CLC Genomics v. 7	516	2981769	37.69	Perirectal swab	Human	14-Nov-2014	USA: Pittsburgh
E. faecium strain VRE2014-7	NLCP00000000	Illumina NextSeq	181x	CLC Genomics v. 7	383	3047588	37.6	Perirectal swab	Human	13-Jan-2014	USA: Pittsburgh
E. faecium strain VRE2015-149	NLCR00000000	Illumina NextSeq	270x	CLC Genomics v. 7	376	2862354	37.79	Perirectal swab	Human	21-Aug-2015	USA: Pittsburgh
E. faecium strain VRE2016-78	NLCS00000000	Illumina NextSeq	221x	CLC Genomics v. 7	372	2921059	37.69	Perirectal swab	Human	27-Feb-2016	USA: Pittsburgh
E. faecium strain FDAARGOS_374	PDFH01000000	PacBio; Illumina	18.29x	SMRT v. 2.3.0; HGAP v. 3	2	2685083	38.09	Skin swab	Human	02-Apr-2015	USA: DC
E. faecium VRE3	JSET00000000	Illumina HiSeq	1275.0x	CLC Genomics v. 6.5.1	142	2820231	37.82	human clinical	Human	17-Feb-1998	San Antonio Texas
E. faecium ATCC 51559	JSVT00000000	Illumina HiSeq	2155.0x	CLC Genomics v. 6.5.1	151	2953574	37.66	na	Human	28-Dec-1992	USA: Brooklyn
E. faecium strain 1197_EFCM	JVZH01000000	Illumina HiSeq	16x	ABYSS v. 1.3.5	466	2978841	37.69	na	Human	na	USA: WA
E. faecium strain 1201_EFCM	JVZB01000000	Illumina HiSeq	14x	ABYSS v. 1.3.5	363	2998785	37.69	na	Human	na	USA: WA
E. faecium strain 1203_EFCM	JVYZ01000000	Illumina HiSeq	14x	ABYSS v. 1.3.5	439	2981317	37.69	na	Human	na	USA: WA
E. faecium strain 1232_EFCM	JVXT01000000	Illumina HiSeq	23x	ABYSS v. 1.3.5	293	3026633	37.69	na	Human	na	USA: WA
E. faecium strain 1048.rep1_EFCM	JWEU01000000	Illumina HiSeq	30x	ABYSS v. 1.3.5	277	2846945	37.75	na	Human	na	USA: WA
E. faecium strain 1165_EFCM	JWAQ01000000	Illumina HiSeq	15x	ABYSS v. 1.3.5	290	3027847	37.61	na	Human	na	USA: WA
E. faecium strain 1216.rep1_EFCM	JVYL01000000	Illumina HiSeq	29x	ABYSS v. 1.3.5	283	3041952	37.71	na	Human	na	USA: WA
E. faecium strain 1231_EFCM	JVXU01000000	Illumina HiSeq	34x	ABYSS v. 1.3.5	332	3005604	37.68	na	Human	na	USA: WA
E. faecium strain 1251_EFCM	JVWY01000000	Illumina HiSeq	32x	ABYSS v. 1.3.5	299	3030300	37.69	na	Human	na	USA: WA
E. faecium strain 1256_EFCM	JVWT01000000	Illumina HiSeq	25x	ABYSS v. 1.3.5	357	3001393	37.69	na	Human	na	USA: WA
E. faecium strain 1070_EFCM	JWEB01000000	Illumina HiSeq	54x	ABYSS v. 1.3.5	166	2669011	38.61	na	Human	na	USA: WA
E. faecium strain 1199_EFCM	JVZE01000000	Illumina HiSeq	14x	ABYSS v. 1.3.5	368	3000263	37.69	na	Human	na	USA: WA
E. faecium strain 1216.rep2_EFCM	JVYK01000000	Illumina HiSeq	35x	ABYSS v. 1.3.5	696	2960363	37.7	na	Human	na	USA: WA
E. faecium strain 1238_EFCM	JVXN01000000	Illumina HiSeq	32x	ABYSS v. 1.3.5	319	3014108	37.69	na	Human	na	USA: WA
E. faecium strain 152_EFCM	JVSE01000000	Illumina HiSeq	23x	ABYSS v. 1.3.5	236	3108172	37.78	na	Human	na	USA: WA
E. faecium strain 514_EFCM	JVEC01000000	Illumina HiSeq	15x	ABYSS v. 1.3.5	230	3039180	37.76	na	Human	na	USA: WA
E. faecium strain 607_EFCM	JVAH01000000	Illumina HiSeq	11x	ABYSS v. 1.3.5	276	2790986	37.76	na	Human	na	USA: WA
E. faecium strain 185_EFCM	JVQW01000000	Illumina HiSeq	27x	ABYSS v. 1.3.5	255	3341215	37.63	na	Human	na	USA: WA
E. faecium strain 199_EFCM	JVQH01000000	Illumina HiSeq	23x	ABYSS v. 1.3.5	350	2982574	37.63	na	Human	na	USA: WA
E. faecium strain 377_EFCM	JVJM01000000	Illumina HiSeq	27x	ABYSS v. 1.3.5	392	2935234	37.69	na	Human	na	USA: WA
E. faecium strain 41_EFCM	JVIG01000000	Illumina HiSeq	14x	ABYSS v. 1.3.5	259	3079017	37.61	na	Human	na	USA: WA
E. faecium strain 43_EFCM	JVHJ01000000	Illumina HiSeq	16x	ABYSS v. 1.3.5	352	2989431	37.59	na	Human	na	USA: WA
E. faecium strain 465_EFCM	JVFZ01000000	Illumina HiSeq	18x	ABYSS v. 1.3.5	233	3162540	37.65	na	Human	na	USA: WA
E. faecium strain 560_EFCM	JVCC01000000	Illumina HiSeq	18x	ABYSS v. 1.3.5	140	2669420	38.09	na	Human	na	USA: WA
E. faecium strain 639_EFCM	JUZB01000000	Illumina HiSeq	23x	ABYSS v. 1.3.5	369	4275216	38.9	na	Human	na	USA: WA
E. faecium strain 704_EFCM	JUWJ01000000	Illumina HiSeq	31x	ABYSS v. 1.3.5	608	2837538	37.71	na	Human	na	USA: WA
E. faecium strain 712_EFCM	JUWB01000000	Illumina HiSeq	13x	ABYSS v. 1.3.5	394	2912824	37.69	na	Human	na	USA: WA
E. faecium strain 715_EFCM	JUVY01000000	Illumina HiSeq	60x	ABYSS v. 1.3.5	356	2955367	37.6	na	Human	na	USA: WA
E. faecium strain 856_EFCM	JUQK01000000	Illumina HiSeq	25x	ABYSS v. 1.3.5	2482	8207512	51.03	na	Human	na	USA: WA
E. faecium strain 702_EFCM	JUWL01000000	Illumina HiSeq	11x	ABYSS v. 1.3.5	422	2949849	37.59	na	Human	na	USA: WA
E. faecium strain 909_EFCM	JUOK01000000	Illumina HiSeq	59x	ABYSS v. 1.3.5	409	2956164	37.61	na	Human	na	USA: WA
E. faecium strain 964_EFCM	JULU01000000	Illumina HiSeq	33x	ABYSS v. 1.3.5	312	3004587	37.72	na	Human	na	USA: WA
E. faecium strain 990_EFCM	JUKT01000000	Illumina HiSeq	42x	ABYSS v. 1.3.5	334	2986521	37.72	na	Human	na	USA: WA
E. faecium strain 967_EFCM	JULR01000000	Illumina HiSeq	35x	ABYSS v. 1.3.5	286	3056876	37.71	na	Human	na	USA: WA
E. faecium strain 969_EFCM	JULP01000000	Illumina HiSeq	13x	ABYSS v. 1.3.5	280	2977159	37.66	na	Human	na	USA: WA
E. faecium strain 999_EFCM	JUKJ01000000	Illumina HiSeq	19x	ABYSS v. 1.3.5	347	2905399	37.65	na	Human	na	USA: WA
E. faecium strain 1250_EFCM	JVWZ01000000	Illumina HiSeq	18x	ABYSS v. 1.3.5	438	2981284	37.69	na	Human	na	USA: WA
E. faecium strain FDAARGOS_138	LORO01000000	Pacbio	28.918x	HGAP3 v. Oct 2014	8	3248528	37.63	Stool	Human	20-Feb-2014	USA: DC
E. faecium strain D344RRF x C68	LRAS00000000	Illumina MiSeq	70.0x	CLB Bio v. 6.0	262	3170658	37.91	laboratory strain		2013	USA: Rhode Island
E. faecium strain D344RRF x C68	LRAV00000000	Illumina MiSeq	54.0x	CLB Bio v. 6.0	211	3016176	38.04	laboratory strain		2013	USA: Rhode Island
E. faecium strain D344RRF x C68	LRAU00000000	Illumina MiSeq	127.0x	CLB Bio v. 6.0	201	3024477	38.06	laboratory strain		2013	USA: Rhode Island
E. faecium strain D344RRF x C68	LRAT00000000	Illumina MiSeq	121.0x	CLB Bio v. 6.0	203	3005374	37.97	laboratory strain		2013	USA: Rhode Island
E. faecium strain D344RRF x C68	LRAW00000000	Illumina MiSeq	116.0x	CLB Bio v. 6.0	203	2992754	38.02	laboratory strain		2013	USA: Rhode Island
E. faecium strain D344RRF x C68	LRBA00000000	Illumina MiSeq	63.0x	CLCBio v. 6.0	201	2971286	37.97	laboratory strain		2013	USA: Rhode Island
E. faecium strain D344RRF x C68	LRAX00000000	Illumina MiSeq	117.0x	CLCBio v. 6.0	241	3098391	37.96	laboratory strain		2013	USA: Rhode Island
E. faecium strain D344RRF x C68	LRAY00000000	Illumina MiSeq	117.0x	CLCBio v. 6.0	262	3135350	38.13	laboratory strain		2013	USA: Rhode Island
E. faecium strain D344RRF x C68	LRAZ00000000	Illumina MiSeq	57.0x	CLCBio v. 6.0	203	2978827	37.97	laboratory strain		2013	USA: Rhode Island
E. faecium strain D344RRF x C68	LRBD00000000	Illumina MiSeq	113.0x	CLCBio v. 6.0	200	2992720	38.02	laboratory strain		2013	USA: Rhode Island
E. faecium strain D344RRF x C68	LRBE00000000	Illumina MiSeq	125.0x	CLCBio v. 6.0	195	3007132	38.03	laboratory strain		2013	USA: Rhode Island
E. faecium strain D344RRF x C68	LRBB00000000	Illumina MiSeq	69.0x	CLCBio v. 6.0	201	2972912	38.01	laboratory strain		2013	USA: Rhode Island
E. faecium strain D344RRF x C68	LRBC00000000	Illumina MiSeq	67.0x	CLCBio v. 6.0	205	2994400	38.02	laboratory strain		2013	USA: Rhode Island
E. faecium strain D344RRF x C68	LRAR00000000	Illumina MiSeq	71.0x	CLB Bio v. 6.0	245	3145999	37.85	laboratory strain		2013	USA: Rhode Island
E. faecium strain D344RRF x C68	LRHK00000000	PacBio	20.0x	HGAP v. 3	11	3631636	37.71	laboratory strain		2013	USA: Rhode Island
E. faecium MRSN 11639	LBIN01000000	Illumina HiSeq 2000	144.8x	Celera Assembler v. 7.0	142	2951462	37.63	Wound	Human	14-Jul-2012	USA
E. faecium MRSN 3418	LBIM01000000	Illumina HiSeq 2000	133.5x	Celera Assembler v. 7.0	136	3048858	37.66	Wound	Human	29-Apr-2011	USA
E. faecium MRSN 4777	LBIL01000000	Illumina HiSeq 2000	9x	Celera Assembler v. 7.0	1495	2413813	37.72	Wound	Human	09-Oct-2011	USA
E. faecium C68	LPUE00000000	PacBio	20.0x	HGAP v. 3	3	3230697	37.83	Clinical isolate	Human	1997	USA: Ohio
na= not applicable
